# Supplementary material for: Study of the role of leukocyte telomere length-related lncRNA NBR2 in Alzheimer’s disease
Source: publisher site journal article supplement (doi:10.18632/aging.206107), 2024-09-16
Supplement: Supplementary file [file aging-v16i18-206107-supplementary-material-SD1.pdf]

**SUPPLEMENTARY TABLES**

**Supplementary Table 1. IVs associated with LTL on AD.**

| <b>IVs associated with LTL on AD</b> |                      |                   |                      |
|--------------------------------------|----------------------|-------------------|----------------------|
| <b>SNP</b>                           | <b>beta</b>          | <b>se</b>         | <b>p</b>             |
| rs10112752                           | 0.036245368586056    | 0.335960595885184 | 0.914086302744282    |
| rs1023767                            | 0.0318330876610498   | 0.598202328717915 | 0.957560936273678    |
| rs10845387                           | -2.23439804521506    | 0.770868499879615 | 0.00374896940811539  |
| rs111527438                          | 0.1226420207984      | 0.808320154808    | 0.879404184404874    |
| rs115610405                          | 0.135653125047028    | 0.331921070657474 | 0.682766504041688    |
| rs11579626                           | -0.67653853842701    | 0.635972285930905 | 0.287425566351911    |
| rs11646283                           | -1.03276164498491    | 0.633135927317576 | 0.102851350253984    |
| rs11866592                           | -0.0888565421036374  | 0.395789941163395 | 0.82236492450604     |
| rs12369950                           | -0.725930392584741   | 0.777176784832986 | 0.350272515749782    |
| rs12613375                           | 0.299590252043144    | 0.760846716847368 | 0.693758967833938    |
| rs1291143                            | 0.432281913149277    | 0.275809968471748 | 0.117040392785504    |
| rs12941945                           | -0.631233574145798   | 0.497076375695793 | 0.204122915970736    |
| rs13129697                           | -0.228596347825633   | 0.621621569699291 | 0.713065633921282    |
| rs13230646                           | -0.839831534225546   | 0.628136900332993 | 0.181216141950711    |
| rs1332941                            | -0.291483776011881   | 0.509999966268047 | 0.56763578614708     |
| rs137901416                          | -0.353778125262467   | 0.340121648626422 | 0.298269407866343    |
| rs139795227                          | -0.00912506310327856 | 0.734918273251148 | 0.990093374787841    |
| rs144204502                          | -0.438618984202677   | 0.433917038694891 | 0.312094907111989    |
| rs181647350                          | -0.914382859633444   | 0.345861126355731 | 0.00819844323220483  |
| rs182059586                          | -0.211057336184845   | 0.657071988141656 | 0.748052127615715    |
| rs1907702                            | -0.519608790891665   | 0.769743554453666 | 0.49964944245128     |
| rs1980240                            | 0.105908226509547    | 0.745852568573192 | 0.887083011457418    |
| rs1985369                            | 0.669705295816193    | 0.465126151917485 | 0.149913853461556    |
| rs2056726                            | 0.147247860566561    | 0.498332026017415 | 0.767626134727134    |
| rs2293607                            | -0.175791281699995   | 0.117004673984947 | 0.132986205123189    |
| rs2303262                            | 0.144742056923011    | 0.239692079898186 | 0.545932293003809    |
| rs28502153                           | -0.0549658376581634  | 0.45240063767391  | 0.903296484974332    |
| rs3093888                            | 0.144358322298347    | 0.737626939057053 | 0.844839964712432    |
| rs35640778                           | -0.589704286884422   | 0.170306915828354 | 0.000534988207818243 |
| rs35671754                           | 0.714915646701244    | 0.829696721453537 | 0.388875194050772    |
| rs3891167                            | -0.290018592562576   | 0.278978713760175 | 0.298538569329448    |
| rs4435700                            | -0.308159027472066   | 0.211939422991374 | 0.145947475094368    |
| rs4498805                            | 0.741224448277236    | 0.629774507033154 | 0.23920827482734     |
| rs4530278                            | -0.11801644199059    | 0.70674935941438  | 0.867381962574147    |
| rs4724                               | 0.0975753234171041   | 0.279984255974105 | 0.727462540965029    |
| rs4743037                            | -1.23284685697873    | 0.762271434828446 | 0.105806388376798    |
| rs4758644                            | -1.18132171212357    | 0.643015661549952 | 0.0661864946541454   |
| rs61748181                           | -0.500385615307278   | 0.521266249933256 | 0.3370841662439      |
| rs6590343                            | -1.51702332287106    | 0.795494585870592 | 0.056518121731675    |
| rs6669563                            | -0.44839645574255    | 0.524620452345387 | 0.39271370915957     |
| rs66731853                           | -1.21970213478748    | 0.567512463437407 | 0.031617942178875    |
| rs6776756                            | -0.53846106593193    | 0.555723139539896 | 0.332576305186575    |
| rs73581419                           | 0.247682240388448    | 0.662445036765026 | 0.708485409074085    |
| rs76219171                           | -0.413438596483427   | 0.564119745961388 | 0.463624575693405    |
| rs762810                             | -0.108553589522824   | 0.491309870506245 | 0.825133467053132    |

|            |                     |                   |                     |
|------------|---------------------|-------------------|---------------------|
| rs76666449 | 0.268208322473189   | 0.528839065080898 | 0.612039504295859   |
| rs7705526  | -0.445782206505743  | 0.142292531483644 | 0.00173113540311976 |
| rs7790856  | -0.0192834938678268 | 0.238335937959602 | 0.935514417689642   |
| rs78491606 | -0.421827731636853  | 0.561317277459934 | 0.452354161193265   |
| rs79228077 | -0.554057619040488  | 0.76235760281677  | 0.467367680235681   |
| rs80324517 | 0.151612587526323   | 0.559452787897053 | 0.786389819706275   |
| rs8102497  | 1.09352745001804    | 0.641690413812528 | 0.0883557653618294  |
| rs8105767  | 0.237753801447695   | 0.319336341283376 | 0.456559089212273   |
| rs869785   | 1.87629640573512    | 0.677902038118029 | 0.00564362956915102 |
| rs871134   | 1.16439596808499    | 0.530562251542741 | 0.0281890491407611  |
| rs932002   | 0.0533718458002945  | 0.324472234345309 | 0.869346854618042   |
| rs939916   | 0.13349415552803    | 0.424216473992432 | 0.75300156033797    |
| rs9419958  | -0.318804296586339  | 0.170001746112199 | 0.0607514454952407  |
| rs9923119  | 1.66453409680992    | 0.674964337571699 | 0.0136590626994769  |

**Supplementary Table 2. Mendelian randomization of exposures on the risk for AD.**

| Mendelian randomization of exposures on the risk for AD |      |              |             |             |           |           |           |
|---------------------------------------------------------|------|--------------|-------------|-------------|-----------|-----------|-----------|
| Method                                                  | nsnp | beta         | se          | pval        | OR        | or_lci95  | or_uci95  |
| MR Egger                                                | 59   | -0.284772361 | 0.096200533 | 0.004473661 | 0.7521855 | 0.6229273 | 0.9082648 |
| Weighted median                                         | 59   | -0.204963971 | 0.07786336  | 0.008479532 | 0.8146767 | 0.6993694 | 0.948995  |
| Inverse variance weighted                               | 59   | -0.192330809 | 0.057355096 | 0.000798442 | 0.8250339 | 0.73731   | 0.923195  |
| Simple mode                                             | 59   | 0.022117346  | 0.159358624 | 0.890097059 | 1.0223637 | 0.7480948 | 1.397186  |
| Weighted mode                                           | 59   | -0.266739507 | 0.083141208 | 0.002175884 | 0.7658725 | 0.6507067 | 0.9014211 |

**Supplementary Table 3. Pleiotropy and heterogeneity of the causal association between LTL and AD.**

| Heterogeneity             |          |      |             |
|---------------------------|----------|------|-------------|
| Method                    | Q        | Q_df | Q-p-val     |
| MR Egger                  | 86.80831 | 57   | 0.006663209 |
| Inverse variance weighted | 88.98135 | 58   | 0.005524221 |
| Pleiotropy                |          |      |             |
| Method                    | p-val    |      |             |
| egger_intercept           | 0.237224 |      |             |
