# Supplementary material for: Study of the role of leukocyte telomere length-related lncRNA NBR2 in Alzheimer’s disease
Source: publisher site journal article supplement (doi:10.18632/aging.206107), 2024-09-16
Supplement: Supplementary file [file aging-v16i18-206107-supplementary-material-SD6.pdf]

**Supplementary Table 8. The list of genes associated with GJA1 in AD brain tissue.**

| <b>gene_name1</b> | <b>gene_name2</b> | <b>cor_r</b>       | <b>p-value</b>       |
|-------------------|-------------------|--------------------|----------------------|
| GJA1              | ADD3              | 0.802371206904213  | 1.17341269039321E-21 |
| GJA1              | CSRP1             | 0.820254711108708  | 2.61773616426948E-23 |
| GJA1              | SLC39A12          | 0.801549080433322  | 1.38449947933484E-21 |
| GJA1              | GABRG3            | -0.637275526922121 | 1.1080578580304E-11  |
| GJA1              | GFRA2             | -0.607471408       | 1.71921683018262E-10 |
| GJA1              | GJA1              | 1                  | 0                    |
| GJA1              | GOT1              | -0.608856007508237 | 1.52315537236684E-10 |
| GJA1              | ICA1              | -0.602400596892852 | 2.66545497842034E-10 |
| GJA1              | IDH3G             | -0.626270516361077 | 3.15525095511253E-11 |
| GJA1              | ATP1A2            | 0.824295131116415  | 1.04551338281366E-23 |
| GJA1              | NOTCH2            | 0.808104375749031  | 3.62158286681252E-22 |
| GJA1              | PAX6              | 0.822685726261586  | 1.51115845882501E-23 |
| GJA1              | GRAMD1C           | 0.816757790187561  | 5.68767509823794E-23 |
| GJA1              | PLSCR4            | 0.83129683399707   | 2.0132995105433E-24  |
| GJA1              | RASGRF1           | -0.601698028693054 | 2.83070247178229E-10 |
| GJA1              | GRAMD3            | 0.829356830850272  | 3.20169444474726E-24 |
| GJA1              | BEND5             | -0.614344090684302 | 9.37105215524573E-11 |
| GJA1              | CC01              | -0.615299465425736 | 8.60296422575356E-11 |
| GJA1              | HSPB3             | -0.636926806041838 | 1.14615294142954E-11 |
