# Supplementary material for: Study of the role of leukocyte telomere length-related lncRNA NBR2 in Alzheimer’s disease
Source: Aging (Albany NY). 2024 Sep 16;16(18):12593–607. doi: 10.18632/aging.206107 (PMC11466486; doi:10.18632/aging.206107)
Supplement: Supplementary Table 4 [file aging-16-206107-s002.xlsx]

## Sheet: Supplementary Table 4 
					Supplementary Table 4. SMR analysis for cis-eQTL genetic variants used as the IVs for gene expression.
probeID	ProbeChr	Gene	Probe_bp	topSNP	topSNP_chr	topSNP_bp	A1	A2	Freq	b_GWAS	se_GWAS	p_GWAS	b_eQTL	se_eQTL	p_eQTL	b_SMR	se_SMR	p_SMR	tissue
ENSG00000198496	17	NBR2	41277627	rs12941945	17	41448228	G	A	0.175944	-0.0261033	0.00269093	3e-22	-0.903092	0.137313	4.80328e-11	0.0289044	0.00530971	5.21906e-08	Brain_Amygdala
ENSG00000198496	17	NBR2	41277627	rs12941945	17	41448228	G	A	0.175944	-0.0261033	0.00269093	3e-22	-0.859508	0.120658	1.05235e-12	0.03037	0.00528944	9.37621e-09	Brain_Anterior_cingulate_cortex_BA24
ENSG00000167900	17	TK1	76170160	rs144204502	17	76183233	T	C	0.0119284	-0.100574	0.00913369	3.4e-28	1.14368	0.198456	8.26822e-09	-0.0879389	0.017223	3.29229e-07	Brain_Anterior_cingulate_cortex_BA24
ENSG00000158825	1	CDA	20915441	rs66731853	1	20916238	A	G	0.290258	-0.0177791	0.00215421	1.5e-16	0.353169	0.0642278	3.82619e-08	-0.0503416	0.0110011	4.738e-06	Brain_Caudate_basal_ganglia
ENSG00000198496	17	NBR2	41277627	rs12941945	17	41448228	G	A	0.175944	-0.0261033	0.00269093	3e-22	-0.911059	0.12003	3.19277e-14	0.0286516	0.00479301	2.26187e-09	Brain_Caudate_basal_ganglia
ENSG00000167900	17	TK1	76170160	rs144204502	17	76183233	T	C	0.0119284	-0.100574	0.00913369	3.4e-28	1.43313	0.165762	5.34684e-18	-0.0701779	0.0103201	1.04549e-11	Brain_Caudate_basal_ganglia
ENSG00000158825	1	CDA	20915441	rs66731853	1	20916238	A	G	0.290258	-0.0177791	0.00215421	1.5e-16	0.353169	0.0642278	3.82619e-08	-0.0503416	0.0110011	4.738e-06	Brain_Caudate_basal_ganglia
ENSG00000117748	1	RPA2	28218035	rs17185038	1	28219658	G	C	0.0616302	-0.0257788	0.00405796	2.1e-10	1.43196	0.111768	1.40742e-37	-0.0180025	0.00316309	1.25989e-08	Brain_Caudate_basal_ganglia
ENSG00000104738	8	MCM4	48872745	rs762679	8	48885436	A	T	0.84493	0.0310104	0.00285024	1.4e-27	0.384885	0.0470729	2.92556e-16	0.0805706	0.0123265	6.30385e-11	Brain_Caudate_basal_ganglia
ENSG00000243708	15	PLA2G4B	42120283	rs17677991	15	42032383	G	C	0.379722	0.0222664	0.00210806	4.4e-26	0.280231	0.0478986	4.90087e-09	0.0794573	0.0155255	3.0901e-07	Brain_Caudate_basal_ganglia
ENSG00000157322	16	CLEC18A	69984810	rs62053340	16	69987764	T	C	0.409543	-0.0213048	0.00207944	1.2e-24	-0.941299	0.0835608	1.95702e-29	0.0226334	0.00298615	3.47022e-14	Brain_Caudate_basal_ganglia
ENSG00000255185	16	PDXDC2P	70044654	rs62053340	16	69987764	T	C	0.409543	-0.0213048	0.00207944	1.2e-24	-0.492965	0.0631104	5.66668e-15	0.0432177	0.00695741	5.23978e-10	Brain_Caudate_basal_ganglia
ENSG00000223496	16	EXOSC6	70284134	rs62053340	16	69987764	T	C	0.409543	-0.0213048	0.00207944	1.2e-24	-0.432599	0.0544237	1.8844e-15	0.0492484	0.00784176	3.37989e-10	Brain_Caudate_basal_ganglia
ENSG00000220205	17	VAMP2	8062467	rs75664430	17	8064779	G	C	0.247515	-0.0235179	0.0023186	3.6e-24	-0.290602	0.0476946	1.1083e-09	0.0809282	0.0154944	1.75977e-07	Brain_Caudate_basal_ganglia
ENSG00000198496	17	NBR2	41277627	rs12941945	17	41448228	G	A	0.175944	-0.0261033	0.00269093	3e-22	-0.911059	0.12003	3.19277e-14	0.0286516	0.00479301	2.26187e-09	Brain_Caudate_basal_ganglia
ENSG00000257949	17	TEN1	73975301	rs2069536	17	74001106	G	A	0.725646	-0.0147561	0.00231358	1.8e-10	0.672966	0.0674128	1.81334e-23	-0.021927	0.00407965	7.6706e-08	Brain_Caudate_basal_ganglia
ENSG00000250506	17	CDK3	73996987	rs2069536	17	74001106	G	A	0.725646	-0.0147561	0.00231358	1.8e-10	0.539139	0.0625848	7.02216e-18	-0.0273698	0.0053394	2.9596e-07	Brain_Caudate_basal_ganglia
ENSG00000167900	17	TK1	76170160	rs144204502	17	76183233	T	C	0.0119284	-0.100574	0.00913369	3.4e-28	1.43313	0.165762	5.34684e-18	-0.0701779	0.0103201	1.04549e-11	Brain_Caudate_basal_ganglia
ENSG00000101751	18	POLI	51795774	rs2276182	18	51798047	G	C	0.428429	0.0233529	0.00204247	2.8e-30	-0.495455	0.0602318	1.93895e-16	-0.0471343	0.00705888	2.43386e-11	Brain_Caudate_basal_ganglia
ENSG00000135698	16	MPHOSPH6	82181403	rs2303262	16	82203758	T	C	0.785288	-0.0469485	0.00239917	2.9e-85	-0.607425	0.0742816	2.90219e-16	0.077291	0.0102439	4.52124e-14	Brain_Cerebellar_Hemisphere
ENSG00000198496	17	NBR2	41277627	rs12941945	17	41448228	G	A	0.175944	-0.0261033	0.00269093	3e-22	-0.944892	0.148766	2.13173e-10	0.0276257	0.00519885	1.07359e-07	Brain_Cerebellar_Hemisphere
ENSG00000267002	17	RP11-242D8.1	41316200	rs12941945	17	41448228	G	A	0.175944	-0.0261033	0.00269093	3e-22	-0.32803	0.0561366	5.11381e-09	0.079576	0.015898	5.57402e-07	Brain_Cerebellar_Hemisphere
ENSG00000167900	17	TK1	76170160	rs144204502	17	76183233	T	C	0.0119284	-0.100574	0.00913369	3.4e-28	1.57594	0.243943	1.04509e-10	-0.0638184	0.0114532	2.51708e-08	Brain_Cerebellar_Hemisphere
ENSG00000197134	19	ZNF257	22235254	rs8105767	19	22215441	G	A	0.277336	0.0328384	0.00220117	2.5e-50	0.771392	0.10765	7.73605e-13	0.0425703	0.00659057	1.05204e-10	Brain_Cerebellar_Hemisphere
ENSG00000117748	1	RPA2	28218035	rs17185038	1	28219658	G	C	0.0616302	-0.0257788	0.00405796	2.1e-10	1.11027	0.0900186	5.95834e-35	-0.0232185	0.00411125	1.62748e-08	Brain_Cerebellar_Hemisphere
ENSG00000104738	8	MCM4	48872745	rs762679	8	48885436	A	T	0.84493	0.0310104	0.00285024	1.4e-27	0.462685	0.0707972	6.34587e-11	0.0670227	0.0119633	2.11478e-08	Brain_Cerebellar_Hemisphere
ENSG00000137802	15	MAPKBP1	42066632	rs17677991	15	42032383	G	C	0.379722	0.0222664	0.00210806	4.4e-26	-0.239323	0.042388	1.64216e-08	-0.0930391	0.0186852	6.3818e-07	Brain_Cerebellar_Hemisphere
ENSG00000243708	15	PLA2G4B	42120283	rs17677991	15	42032383	G	C	0.379722	0.0222664	0.00210806	4.4e-26	0.270901	0.0447192	1.37977e-09	0.0821939	0.0156413	1.4809e-07	Brain_Cerebellar_Hemisphere
ENSG00000102910	16	LONP2	48278207	rs8053839	16	48390512	T	G	0.526839	-0.0139207	0.00204649	1e-11	0.379089	0.0436175	3.58576e-18	-0.0367215	0.00685528	8.47701e-08	Brain_Cerebellar_Hemisphere
ENSG00000198373	16	WWP2	69796209	rs62053340	16	69987764	T	C	0.409543	-0.0213048	0.00207944	1.2e-24	0.340285	0.0555777	9.201e-10	-0.0626087	0.0119125	1.47449e-07	Brain_Cerebellar_Hemisphere
ENSG00000157322	16	CLEC18A	69984810	rs62053340	16	69987764	T	C	0.409543	-0.0213048	0.00207944	1.2e-24	-0.700688	0.0941769	1.0059e-13	0.0304055	0.00505059	1.742e-09	Brain_Cerebellar_Hemisphere
ENSG00000255185	16	PDXDC2P	70044654	rs62053340	16	69987764	T	C	0.409543	-0.0213048	0.00207944	1.2e-24	-0.413498	0.0533981	9.65767e-15	0.0515233	0.00834027	6.50602e-10	Brain_Cerebellar_Hemisphere
ENSG00000261556	16	RP11-296I10.6	70253477	rs62053340	16	69987764	T	C	0.409543	-0.0213048	0.00207944	1.2e-24	-0.339049	0.0586491	7.4269e-09	0.0628369	0.0124805	4.7837e-07	Brain_Cerebellar_Hemisphere
ENSG00000223496	16	EXOSC6	70284134	rs62053340	16	69987764	T	C	0.409543	-0.0213048	0.00207944	1.2e-24	-0.554278	0.0743384	8.90915e-14	0.038437	0.0063757	1.65305e-09	Brain_Cerebellar_Hemisphere
ENSG00000135698	16	MPHOSPH6	82181403	rs2303262	16	82203758	T	C	0.785288	-0.0469485	0.00239917	2.9e-85	-0.607425	0.0742816	2.90219e-16	0.077291	0.0102439	4.52124e-14	Brain_Cerebellar_Hemisphere
ENSG00000198496	17	NBR2	41277627	rs12941945	17	41448228	G	A	0.175944	-0.0261033	0.00269093	3e-22	-0.944892	0.148766	2.13173e-10	0.0276257	0.00519885	1.07359e-07	Brain_Cerebellar_Hemisphere
ENSG00000267002	17	RP11-242D8.1	41316200	rs12941945	17	41448228	G	A	0.175944	-0.0261033	0.00269093	3e-22	-0.32803	0.0561366	5.11381e-09	0.079576	0.015898	5.57402e-07	Brain_Cerebellar_Hemisphere
ENSG00000257949	17	TEN1	73975301	rs2069536	17	74001106	G	A	0.725646	-0.0147561	0.00231358	1.8e-10	1.03899	0.0955864	1.60827e-27	-0.0142024	0.0025818	3.77738e-08	Brain_Cerebellar_Hemisphere
ENSG00000250506	17	CDK3	73996987	rs2069536	17	74001106	G	A	0.725646	-0.0147561	0.00231358	1.8e-10	0.772867	0.0715037	3.12833e-27	-0.0190927	0.00347581	3.95127e-08	Brain_Cerebellar_Hemisphere
ENSG00000167900	17	TK1	76170160	rs144204502	17	76183233	T	C	0.0119284	-0.100574	0.00913369	3.4e-28	1.57594	0.243943	1.04509e-10	-0.0638184	0.0114532	2.51708e-08	Brain_Cerebellar_Hemisphere
ENSG00000101751	18	POLI	51795774	rs2276182	18	51798047	G	C	0.428429	0.0233529	0.00204247	2.8e-30	-0.736083	0.0722193	2.14569e-24	-0.0317259	0.00416995	2.77887e-14	Brain_Cerebellar_Hemisphere
ENSG00000197134	19	ZNF257	22235254	rs8105767	19	22215441	G	A	0.277336	0.0328384	0.00220117	2.5e-50	0.771392	0.10765	7.73605e-13	0.0425703	0.00659057	1.05204e-10	Brain_Cerebellar_Hemisphere
ENSG00000135698	16	MPHOSPH6	82181403	rs2303262	16	82203758	T	C	0.785288	-0.0469485	0.00239917	2.9e-85	-0.617163	0.0790012	5.62539e-15	0.0760715	0.010485	4.00788e-13	Brain_Cerebellum
ENSG00000198496	17	NBR2	41277627	rs12941945	17	41448228	G	A	0.175944	-0.0261033	0.00269093	3e-22	-0.663537	0.110418	1.86325e-09	0.0393396	0.00770082	3.24729e-07	Brain_Cerebellum
ENSG00000167900	17	TK1	76170160	rs144204502	17	76183233	T	C	0.0119284	-0.100574	0.00913369	3.4e-28	1.62372	0.220545	1.80751e-13	-0.0619405	0.0101205	9.33928e-10	Brain_Cerebellum
ENSG00000197134	19	ZNF257	22235254	rs8105767	19	22215441	G	A	0.277336	0.0328384	0.00220117	2.5e-50	0.769625	0.107794	9.34648e-13	0.0426681	0.00662522	1.19276e-10	Brain_Cerebellum
ENSG00000198496	17	NBR2	41277627	rs12941945	17	41448228	G	A	0.175944	-0.0261033	0.00269093	3e-22	-0.727278	0.101018	6.04542e-13	0.0358918	0.00620836	7.41681e-09	Brain_Cortex
ENSG00000198496	17	NBR2	41277627	rs12941945	17	41448228	G	A	0.175944	-0.0261033	0.00269093	3e-22	-0.854851	0.141161	1.39666e-09	0.0305355	0.00594421	2.79141e-07	Brain_Frontal_Cortex_BA9
ENSG00000117748	1	RPA2	28218035	rs17185038	1	28219658	G	C	0.0616302	-0.0257788	0.00405796	2.1e-10	1.38182	0.116965	3.30686e-32	-0.0186557	0.00333432	2.20565e-08	Brain_Frontal_Cortex_BA9
ENSG00000104738	8	MCM4	48872745	rs762679	8	48885436	A	T	0.84493	0.0310104	0.00285024	1.4e-27	0.464276	0.0586858	2.54877e-15	0.066793	0.0104389	1.56915e-10	Brain_Frontal_Cortex_BA9
ENSG00000157322	16	CLEC18A	69984810	rs62053340	16	69987764	T	C	0.409543	-0.0213048	0.00207944	1.2e-24	-0.93718	0.0970242	4.49164e-22	0.0227329	0.00323451	2.09183e-12	Brain_Frontal_Cortex_BA9
ENSG00000255185	16	PDXDC2P	70044654	rs62053340	16	69987764	T	C	0.409543	-0.0213048	0.00207944	1.2e-24	-0.570108	0.0629335	1.31771e-19	0.0373698	0.00550646	1.14866e-11	Brain_Frontal_Cortex_BA9
ENSG00000223496	16	EXOSC6	70284134	rs62053340	16	69987764	T	C	0.409543	-0.0213048	0.00207944	1.2e-24	-0.420121	0.0642362	6.14139e-11	0.0507111	0.00919883	3.53212e-08	Brain_Frontal_Cortex_BA9
ENSG00000198496	17	NBR2	41277627	rs12941945	17	41448228	G	A	0.175944	-0.0261033	0.00269093	3e-22	-0.854851	0.141161	1.39666e-09	0.0305355	0.00594421	2.79141e-07	Brain_Frontal_Cortex_BA9
ENSG00000257949	17	TEN1	73975301	rs2069536	17	74001106	G	A	0.725646	-0.0147561	0.00231358	1.8e-10	0.570489	0.0599185	1.7139e-21	-0.0258657	0.00488128	1.16463e-07	Brain_Frontal_Cortex_BA9
ENSG00000250506	17	CDK3	73996987	rs2069536	17	74001106	G	A	0.725646	-0.0147561	0.00231358	1.8e-10	0.413462	0.0486601	1.94644e-17	-0.0356891	0.00699664	3.38052e-07	Brain_Frontal_Cortex_BA9
ENSG00000101751	18	POLI	51795774	rs2276182	18	51798047	G	C	0.428429	0.0233529	0.00204247	2.8e-30	-0.443838	0.064236	4.86399e-12	-0.0526158	0.00889749	3.3479e-09	Brain_Frontal_Cortex_BA9
ENSG00000135698	16	MPHOSPH6	82181403	rs2303262	16	82203758	T	C	0.785288	-0.0469485	0.00239917	2.9e-85	-0.300008	0.0549102	4.66547e-08	0.156491	0.0297378	1.42227e-07	Brain_Hippocampus
ENSG00000198496	17	NBR2	41277627	rs12941945	17	41448228	G	A	0.175944	-0.0261033	0.00269093	3e-22	-0.752569	0.128597	4.85307e-09	0.0346856	0.00692204	5.41788e-07	Brain_Hippocampus
ENSG00000198496	17	NBR2	41277627	rs12941945	17	41448228	G	A	0.175944	-0.0261033	0.00269093	3e-22	-0.847422	0.142362	2.63921e-09	0.0308032	0.00607136	3.90511e-07	Brain_Hypothalamus
ENSG00000197134	19	ZNF257	22235254	rs8105767	19	22215441	G	A	0.277336	0.0328384	0.00220117	2.5e-50	0.720474	0.0977252	1.67526e-13	0.0455789	0.00689603	3.85785e-11	Brain_Hypothalamus
ENSG00000198496	17	NBR2	41277627	rs12941945	17	41448228	G	A	0.175944	-0.0261033	0.00269093	3e-22	-0.797065	0.115753	5.74109e-12	0.0327493	0.0058324	1.965e-08	Brain_Nucleus_accumbens_basal_ganglia
ENSG00000167900	17	TK1	76170160	rs144204502	17	76183233	T	C	0.0119284	-0.100574	0.00913369	3.4e-28	1.46518	0.170729	9.33347e-18	-0.0686428	0.0101409	1.29762e-11	Brain_Nucleus_accumbens_basal_ganglia
ENSG00000197134	19	ZNF257	22235254	rs8105767	19	22215441	G	A	0.277336	0.0328384	0.00220117	2.5e-50	0.477143	0.0825149	7.3594e-09	0.068823	0.0127647	6.98083e-08	Brain_Nucleus_accumbens_basal_ganglia
