# Supplementary material for: Study of the role of leukocyte telomere length-related lncRNA NBR2 in Alzheimer’s disease
Source: Aging (Albany NY). 2024 Sep 16;16(18):12593–607. doi: 10.18632/aging.206107 (PMC11466486; doi:10.18632/aging.206107)
Supplement: Supplementary Table 5 [file aging-16-206107-s003.xlsx]

## Sheet: Supplementary table5
Supplementary Table 5. The mRNA targets of miR-19-3p predicted.
Target gene	Representative transcript	Gene name	3P-seq tags + 5	Conserved sites total	Conserved 8mer sites	Conserved 7mer-m8 sites	Conserved 7mer-A1 sites	Poorly conserved sites total	Poorly conserved 8mer sites	Poorly conserved 7mer-m8 sites	Poorly conserved 7mer-A1 sites	6mer sites	Representative miRNA	Predicted occupancy (low miRNA)	Predicted occupancy (high miRNA)	Predicted occupancy (transfected miRNA)	Cumulative weighted context++ score	Total context++ score	Aggregate PCT	Previous TargetScan publication(s)
CTDSPL2	ENST00000260327.4	CTD (carboxy-terminal domain, RNA polymerase II, polypeptide A) small phosphatase like 2	457	1*	0	0	0	2	0	1	1	1	hsa-miR-19a-3p	0.005	0.0365	0.2539	-1.28	-1.4	< 0.1	2011
KBTBD8	ENST00000295568.4	kelch repeat and BTB (POZ) domain containing 8	22	1	0	0	1	3	0	2	1	0	hsa-miR-19a-3p	0.0763	0.5137	2.3945	-1.2	-1.2	0.83	2007, 2009, 2011
ZMYND11	ENST00000381591.1	zinc finger, MYND-type containing 11	43	4	2	1	1	0	0	0	0	1	hsa-miR-19a-3p	0.1594	0.8829	2.5254	-1.06	-1.1	> 0.99	2003, 2005, 2007, 2009, 2011
CHIC1	ENST00000373504.6	cysteine-rich hydrophobic domain 1	16	3	2	1	0	0	0	0	0	2	hsa-miR-19a-3p	0.1139	0.6687	2.2417	-0.98	-1.01	0.98	2007, 2009, 2011
C11orf96	ENST00000339446.3	chromosome 11 open reading frame 96	475	2	2	0	0	0	0	0	0	0	hsa-miR-19a-3p	0.1154	0.5652	1.3996	-0.96	-0.96	0.86	2011
QKI	ENST00000392127.2	QKI, KH domain containing, RNA binding	323	3	2	1	0	2	1	0	1	2	hsa-miR-19a-3p	0.1526	0.8611	2.7671	-0.88	-0.95	0.96	2005, 2007, 2009, 2011
PMEPA1	ENST00000341744.3	prostate transmembrane protein, androgen induced 1	736	2	1	1	0	0	0	0	0	0	hsa-miR-19a-3p	0.129	0.6585	1.6088	-0.87	-0.87	0.98	2005, 2007, 2009, 2011
LONRF1	ENST00000398246.3	LON peptidase N-terminal domain and ring finger 1	36	2	2	0	0	1	0	0	1	1	hsa-miR-19a-3p	0.1111	0.672	2.3673	-0.84	-0.84	0.98	2003, 2007, 2009, 2011
ZBTB18	ENST00000358704.4	zinc finger and BTB domain containing 18	935	3	1	1	1	0	0	0	0	1	hsa-miR-19a-3p	0.1415	0.7518	2.2471	-0.83	-0.84	0.98	2003, 2005, 2007, 2009, 2011
RNF11	ENST00000242719.3	ring finger protein 11	5881	2	2	0	0	1	1	0	0	0	hsa-miR-19a-3p	0.1019	0.5722	1.6398	-0.81	-1.11	0.98	2003, 2005, 2007, 2009, 2011
HBP1	ENST00000222574.4	HMG-box transcription factor 1	167	2	1	1	0	0	0	0	0	1	hsa-miR-19a-3p	0.0937	0.507	1.4778	-0.78	-0.78	0.92	2005, 2007, 2009, 2011
KCNA4	ENST00000328224.6	potassium voltage-gated channel, shaker-related subfamily, member 4	5	2	1	1	0	0	0	0	0	0	hsa-miR-19a-3p	0.1136	0.5995	1.5165	-0.76	-0.76	0.97	2003, 2005, 2007, 2009, 2011
NEUROD1	ENST00000295108.3	neuronal differentiation 1	5	2	0	1	1	2	0	0	2	0	hsa-miR-19a-3p	0.0776	0.477	1.7383	-0.76	-0.86	0.95	2005, 2007, 2009, 2011
SPTSSB	ENST00000359175.4	serine palmitoyltransferase, small subunit B	15	1	0	1	0	1	1	0	0	0	hsa-miR-19a-3p	0.0314	0.2088	0.9325	-0.74	-0.74	0.12	NULL
DTNA	ENST00000283365.9	dystrobrevin, alpha	144	2	2	0	0	2	0	1	1	0	hsa-miR-19a-3p	0.1122	0.6695	2.4921	-0.74	-0.75	0.82	2005, 2007, 2009, 2011
MPPED2	ENST00000358117.5	metallophosphoesterase domain containing 2	42	2	1	1	0	0	0	0	0	0	hsa-miR-19a-3p	0.1289	0.6714	1.6078	-0.73	-0.73	0.96	2003, 2007, 2009, 2011
ATL2	ENST00000406122.1	atlastin GTPase 2	1135	1	1	0	0	1	0	0	1	0	hsa-miR-19b-3p	0.0953	0.482	1.2423	-0.73	-0.73	0.85	2005, 2007, 2009, 2011
DNAJA2	ENST00000317089.5	DnaJ (Hsp40) homolog, subfamily A, member 2	1487	2	1	0	1	0	0	0	0	0	hsa-miR-19b-3p	0.0557	0.3282	1.1057	-0.72	-0.74	0.94	2005, 2007, 2009, 2011
TAOK1	ENST00000261716.3	TAO kinase 1	164	2	2	0	0	1	0	0	1	1	hsa-miR-19b-3p	0.0993	0.6152	2.5555	-0.7	-0.79	0.86	2011
PLA2G10	ENST00000438167.3	phospholipase A2, group X	5	1	1	0	0	0	0	0	0	0	hsa-miR-19a-3p	0.0202	0.1322	0.5295	-0.7	-0.7	< 0.1	2009, 2011
CDS1	ENST00000295887.5	CDP-diacylglycerol synthase (phosphatidate cytidylyltransferase) 1	720	2	1	1	0	1	0	1	0	1	hsa-miR-19a-3p	0.0821	0.508	1.9008	-0.69	-0.75	0.88	2011
TIA1	ENST00000433529.2	TIA1 cytotoxic granule-associated RNA binding protein	1370	2	1	0	1	1	0	0	1	0	hsa-miR-19a-3p	0.0764	0.4503	1.5501	-0.69	-0.81	0.84	2007, 2009, 2011
ITSN1	ENST00000379960.5	intersectin 1 (SH3 domain protein)	194	2	2	0	0	0	0	0	0	1	hsa-miR-19a-3p	0.1185	0.6391	1.7918	-0.69	-0.72	0.83	2005, 2007, 2009, 2011
ADRB1	ENST00000369295.2	adrenoceptor beta 1	12	2	1	0	1	2	1	0	1	0	hsa-miR-19b-3p	0.0971	0.5554	1.8668	-0.68	-0.68	0.93	2007, 2009, 2011
RAB8B	ENST00000321437.4	RAB8B, member RAS oncogene family	45	2	2	0	0	0	0	0	0	0	hsa-miR-19a-3p	0.0923	0.5225	1.4986	-0.68	-0.68	0.79	2005, 2007, 2009, 2011
SGK1	ENST00000367858.5	serum/glucocorticoid regulated kinase 1	369	1	1	0	0	1	0	0	1	0	hsa-miR-19a-3p	0.0656	0.3743	1.1795	-0.67	-0.67	0.85	2005, 2007, 2009, 2011
RAP2C	ENST00000342983.2	RAP2C, member of RAS oncogene family	604	2	1	1	0	0	0	0	0	1	hsa-miR-19a-3p	0.0738	0.4236	1.4136	-0.66	-0.67	0.89	2005, 2007, 2009, 2011
KLF7	ENST00000423015.1	Kruppel-like factor 7 (ubiquitous)	737	1	0	1	0	2	1	1	0	0	hsa-miR-19a-3p	0.0626	0.4085	1.7076	-0.66	-0.66	0.84	NULL
IMPDH1	ENST00000419067.2	IMP (inosine 5'-monophosphate) dehydrogenase 1	51	2	1	1	0	0	0	0	0	0	hsa-miR-19a-3p	0.0967	0.5446	1.4661	-0.66	-0.66	0.96	2005, 2007, 2009, 2011
SHCBP1	ENST00000303383.3	SHC SH2-domain binding protein 1	59	2	1	0	1	0	0	0	0	1	hsa-miR-19b-3p	0.0787	0.4586	1.4356	-0.65	-0.68	0.94	2009, 2011
GJA1	ENST00000282561.3	gap junction protein, alpha 1, 43kDa	1732	2	0	2	0	1	0	0	1	0	hsa-miR-19a-3p	0.0503	0.3382	1.5551	-0.65	-0.65	0.77	2007, 2009, 2011
NFIB	ENST00000397575.3	nuclear factor I/B	1149	2	0	2	0	2	0	0	2	1	hsa-miR-19a-3p	0.1084	0.6379	2.1998	-0.64	-0.85	0.99	2007, 2009, 2011
RBBP8	ENST00000399722.2	retinoblastoma binding protein 8	88	2	0	2	0	0	0	0	0	0	hsa-miR-19a-3p	0.0706	0.4158	1.2602	-0.64	-0.7	0.97	2009
TRAK2	ENST00000332624.3	trafficking protein, kinesin binding 2	353	1	1	0	0	1	0	0	1	0	hsa-miR-19b-3p	0.0958	0.4879	1.3559	-0.63	-0.67	0.86	2007, 2009, 2011
MDM4	ENST00000391947.2	Mdm4 p53 binding protein homolog (mouse)	443	2	0	2	0	1	0	1	0	1	hsa-miR-19a-3p	0.0649	0.4232	1.7312	-0.63	-0.69	0.95	2009, 2011
CHST1	ENST00000308064.2	carbohydrate (keratan sulfate Gal-6) sulfotransferase 1	5	2	0	2	0	0	0	0	0	0	hsa-miR-19a-3p	0.0759	0.4454	1.3392	-0.62	-0.62	0.97	2007, 2009, 2011
TMBIM6	ENST00000423828.1	transmembrane BAX inhibitor motif containing 6	4043	1	1	0	0	0	0	0	0	0	hsa-miR-19a-3p	0.0577	0.3125	0.7838	-0.62	-0.62	0.8	2009, 2011
RHOB	ENST00000272233.4	ras homolog family member B	6532	1	1	0	0	1	0	0	1	0	hsa-miR-19a-3p	0.0635	0.3572	1.0954	-0.62	-0.63	0.71	2005, 2007, 2009, 2011
ID2	ENST00000234091.4	inhibitor of DNA binding 2, dominant negative helix-loop-helix protein	20	1	1	0	0	0	0	0	0	0	hsa-miR-19a-3p	0.0791	0.3884	0.8243	-0.62	-0.62	0.83	2007, 2009, 2011
BNC2	ENST00000380672.4	basonuclin 2	770	2*	1	0	0	4	1	0	3	4	hsa-miR-19b-3p	0.0753	0.4055	1.1912	-0.62	-2.86	0.94	2005, 2007, 2011
C8orf4	ENST00000315792.3	chromosome 8 open reading frame 4	3820	1	0	0	1	1	0	1	0	0	hsa-miR-19a-3p	0.0292	0.1971	0.8876	-0.61	-0.61	0.58	2009, 2011
PTEN	ENST00000371953.3	phosphatase and tensin homolog	118	3	1	2	0	0	0	0	0	0	hsa-miR-19b-3p	0.1255	0.6865	2.1015	-0.61	-0.69	> 0.99	2011
HOMER1	ENST00000508576.1	homer homolog 1 (Drosophila)	394	2	0	1	1	0	0	0	0	0	hsa-miR-19a-3p	0.0471	0.309	1.2937	-0.61	-0.62	0.89	2011
SYT1	ENST00000457153.2	synaptotagmin I	13	2	2	0	0	0	0	0	0	0	hsa-miR-19a-3p	0.1378	0.6747	1.5699	-0.61	-0.61	0.95	2005, 2007, 2009, 2011
SLC35F1	ENST00000360388.4	solute carrier family 35, member F1	56	2	1	1	0	0	0	0	0	1	hsa-miR-19a-3p	0.0935	0.5223	1.619	-0.61	-0.61	0.97	2007, 2009, 2011
CCNL1	ENST00000295926.3	cyclin L1	161	1	1	0	0	0	0	0	0	0	hsa-miR-19a-3p	0.0739	0.3708	0.8132	-0.61	-0.61	0.87	2007, 2009, 2011
MRPL17	ENST00000288937.6	mitochondrial ribosomal protein L17	1447	1	1	0	0	0	0	0	0	0	hsa-miR-19a-3p	0.05	0.2805	0.7478	-0.61	-0.61	0.67	2009, 2011
RAI2	ENST00000415486.3	retinoic acid induced 2	46	1	0	0	1	1	0	1	0	0	hsa-miR-19a-3p	0.0275	0.1835	0.8107	-0.6	-0.6	0.59	2005, 2007
BAMBI	ENST00000375533.3	BMP and activin membrane-bound inhibitor	515	1	1	0	0	0	0	0	0	0	hsa-miR-19a-3p	0.0698	0.3635	0.894	-0.6	-0.6	0.87	2005, 2007, 2009, 2011
KIAA0101	ENST00000558008.1	KIAA0101	6821	1	1	0	0	0	0	0	0	0	hsa-miR-19a-3p	0.0542	0.2922	0.7397	-0.59	-0.68	0.85	2009, 2011
EMC7	ENST00000256545.4	ER membrane protein complex subunit 7	672	2	2	0	0	0	0	0	0	0	hsa-miR-19a-3p	0.0566	0.3076	0.7691	-0.57	-0.72	0.87	2009, 2011
RORA	ENST00000335670.6	RAR-related orphan receptor A	102	3	2	1	0	1	0	0	1	0	hsa-miR-19a-3p	0.1433	0.837	2.7171	-0.56	-0.68	> 0.99	2011
ITGB8	ENST00000222573.4	integrin, beta 8	17	2	1	1	0	1	0	0	1	1	hsa-miR-19a-3p	0.0871	0.4731	1.5486	-0.55	-0.81	0.97	2007, 2009, 2011
CLIP4	ENST00000320081.5	CAP-GLY domain containing linker protein family, member 4	490	2	2	0	0	0	0	0	0	0	hsa-miR-19a-3p	0.063	0.3929	1.4273	-0.54	-0.6	0.13	2007, 2009, 2011
ZNF772	ENST00000425074.3	zinc finger protein 772	22	1	0	0	1	2	0	2	0	0	hsa-miR-19a-3p	0.0286	0.1976	1.0059	-0.54	-0.63	< 0.1	NULL
F3	ENST00000334047.7	coagulation factor III (thromboplastin, tissue factor)	13568	1	1	0	0	1	0	1	0	1	hsa-miR-19a-3p	0.09	0.4425	1.0488	-0.54	-0.7	0.83	2005, 2007, 2009, 2011
GRSF1	ENST00000254799.6	G-rich RNA sequence binding factor 1	4414	1	1	0	0	1	1	0	0	1	hsa-miR-19a-3p	0.0592	0.3187	0.7877	-0.53	-0.67	0.87	2005, 2007, 2009, 2011
PON2	ENST00000536183.1	paraoxonase 2	597	1	1	0	0	1	0	1	0	0	hsa-miR-19a-3p	0.0702	0.3619	0.8529	-0.53	-0.62	0.78	2009, 2011
CACUL1	ENST00000369151.3	CDK2-associated, cullin domain 1	213	2	2	0	0	1	1	0	0	1	hsa-miR-19a-3p	0.0874	0.5156	1.7078	-0.51	-0.81	0.92	2007, 2009, 2011
ATXN1	ENST00000244769.4	ataxin 1	106	5	2	1	2	2	0	2	0	2	hsa-miR-19a-3p	0.1576	0.8828	2.8636	-0.5	-0.69	> 0.99	2005, 2007, 2009, 2011
PPP1R12A	ENST00000261207.5	protein phosphatase 1, regulatory subunit 12A	276	2	1	0	1	1	0	0	1	0	hsa-miR-19b-3p	0.0583	0.3503	1.2857	-0.5	-0.6	0.88	2005, 2007, 2009, 2011
ACBD5	ENST00000396271.3	acyl-CoA binding domain containing 5	77	2	1	1	0	0	0	0	0	0	hsa-miR-19a-3p	0.071	0.4145	1.2736	-0.5	-0.63	0.97	2007, 2009, 2011
MXD1	ENST00000264444.2	MAX dimerization protein 1	183	2	0	2	0	1	0	0	1	2	hsa-miR-19a-3p	0.0484	0.3095	1.2959	-0.48	-0.61	0.92	2009, 2011
BMPR2	ENST00000374574.2	bone morphogenetic protein receptor, type II (serine/threonine kinase)	287	2	1	1	0	2	0	1	1	0	hsa-miR-19a-3p	0.0939	0.5079	1.3907	-0.48	-0.64	0.97	2005, 2007, 2009, 2011
LDLR	ENST00000558518.1	low density lipoprotein receptor	1462	2	0	2	0	1	0	1	0	2	hsa-miR-19a-3p	0.0693	0.4305	1.6045	-0.47	-0.63	0.97	2011
TGFBR2	ENST00000359013.4	transforming growth factor, beta receptor II (70/80kDa)	2168	1	0	1	0	2	1	0	1	3	hsa-miR-19a-3p	0.0469	0.2918	1.135	-0.47	-0.97	0.93	2007, 2009, 2011
S1PR1	ENST00000305352.6	sphingosine-1-phosphate receptor 1	251	2	1	1	0	0	0	0	0	0	hsa-miR-19a-3p	0.077	0.4177	1.1101	-0.45	-0.71	0.98	2005, 2007, 2009, 2011
LIMCH1	ENST00000313860.7	LIM and calponin homology domains 1	1058	2	1	0	1	1	0	0	1	1	hsa-miR-19a-3p	0.0633	0.3492	0.979	-0.44	-0.74	0.63	2007, 2009, 2011
CNR1	ENST00000362094.5	cannabinoid receptor 1 (brain)	40	1	0	0	1	1	1	0	0	1	hsa-miR-19a-3p	0.0403	0.2656	1.1676	-0.42	-0.61	0.58	2005, 2007, 2009, 2011
MIER1	ENST00000357692.2	mesoderm induction early response 1, transcriptional regulator	950	1	0	1	0	1	0	1	0	2	hsa-miR-19a-3p	0.0393	0.2438	0.9577	-0.39	-0.68	0.84	2007, 2009, 2011
BNIP2	ENST00000267859.3	BCL2/adenovirus E1B 19kDa interacting protein 2	1255	1	0	0	1	2	0	0	2	0	hsa-miR-19a-3p	0.019	0.1334	0.739	-0.39	-0.62	0.58	NULL
PNRC1	ENST00000336032.3	proline-rich nuclear receptor coactivator 1	413	1	1	0	0	1	1	0	0	0	hsa-miR-19a-3p	0.0707	0.3257	0.6369	-0.38	-0.74	0.87	2005, 2007, 2009, 2011
SKIDA1	ENST00000449193.2	SKI/DACH domain containing 1	18	2	0	2	0	0	0	0	0	1	hsa-miR-19b-3p	0.0505	0.3039	1.0498	-0.38	-0.63	0.97	2003, 2005, 2007, 2009, 2011
ACSL4	ENST00000469796.2	acyl-CoA synthetase long-chain family member 4	229	1	0	1	0	3	0	2	1	0	hsa-miR-19a-3p	0.0313	0.2091	1.005	-0.37	-0.62	0.8	2005, 2007, 2009, 2011
BTG1	ENST00000256015.3	B-cell translocation gene 1, anti-proliferative	1677	2	0	1	1	2	0	0	2	0	hsa-miR-19a-3p	0.0384	0.2287	0.6985	-0.36	-0.77	0.93	2007, 2011
SIRT5	ENST00000606117.1	sirtuin 5	72	1	1	0	0	1	1	0	0	0	hsa-miR-19a-3p	0.0265	0.1667	0.594	-0.29	-0.65	0.31	2011
LGALSL	ENST00000409537.2	lectin, galactoside-binding-like	334	2	1	1	0	0	0	0	0	0	hsa-miR-19a-3p	0.036	0.1891	0.4535	-0.27	-0.94	0.97	2009, 2011
SLC30A7	ENST00000370112.4	solute carrier family 30 (zinc transporter), member 7	204	2	2	0	0	2	0	2	0	0	hsa-miR-19a-3p	0.0315	0.2077	0.9259	-0.26	-0.71	0.7	2011
INSIG2	ENST00000245787.4	insulin induced gene 2	562	1	1	0	0	2	1	1	0	0	hsa-miR-19b-3p	0.0431	0.2478	0.7094	-0.24	-0.72	0.47	2009, 2011
NCKAP1	ENST00000361354.4	NCK-associated protein 1	700	1	0	0	1	1	0	0	1	3	hsa-miR-19a-3p	0.0243	0.1711	0.96	-0.24	-0.74	0.58	NULL
ZBTB20	ENST00000462705.1	zinc finger and BTB domain containing 20	5	4	0	3	1	1	1	0	0	2	hsa-miR-19a-3p	0.0103	0.0728	0.4116	-0.2	-0.97	> 0.99	NULL
HCFC2	ENST00000229330.4	host cell factor C2	46	3	2	1	0	1	0	1	0	1	hsa-miR-19a-3p	0.0347	0.1899	0.5544	-0.14	-0.84	> 0.99	2011
SIVA1	ENST00000347067.5	SIVA1, apoptosis-inducing factor	860	1	1	0	0	0	0	0	0	0	hsa-miR-19a-3p	0.0007	0.0043	0.0137	-0.01	-0.76	< 0.1	2011
