# Supplementary material for: Study of the role of leukocyte telomere length-related lncRNA NBR2 in Alzheimer’s disease
Source: Aging (Albany NY). 2024 Sep 16;16(18):12593–607. doi: 10.18632/aging.206107 (PMC11466486; doi:10.18632/aging.206107)
Supplement: Supplementary Table 6 [file aging-16-206107-s004.xlsx]

## Sheet: Supplementary table6
Supplementary Table 6. The mRNA targets of miR-19-5p predicted.
Target gene	Representative transcript	Gene name	3P-seq tags + 5	Total sites	8mer sites	7mer-m8 sites	7mer-A1 sites	6mer sites	Representative miRNA	Predicted occupancy (low miRNA)	Predicted occupancy (high miRNA)	Predicted occupancy (transfected miRNA)	Cumulative weighted context++ score	Total context++ score
KCNJ6	ENST00000609713.1	potassium inwardly-rectifying channel, subfamily J, member 6	5	10	0	3	7	4	hsa-miR-19b-1-5p				-1.24	-1.24
SMCO3	ENST00000316048.2	single-pass membrane protein with coiled-coil domains 3	5	3	2	1	0	2	hsa-miR-19a-5p				-1.07	-1.07
HOXA6	ENST00000222728.3	homeobox A6	5	5	0	0	5	0	hsa-miR-19b-1-5p				-1.04	-1.04
AL359878.1	ENST00000381466.1	Uncharacterized protein	5	3	1	2	0	0	hsa-miR-19a-5p				-0.74	-0.74
ZNF28	ENST00000438150.2	zinc finger protein 28	9	2	2	0	0	0	hsa-miR-19a-5p				-0.69	-0.69
NRXN1	ENST00000342183.5	neurexin 1	5	3	1	0	2	0	hsa-miR-19b-1-5p				-0.65	-0.65
RPLP0	ENST00000392514.4	ribosomal protein, large, P0	43	1	1	0	0	0	hsa-miR-19a-5p				-0.65	-0.65
CTD-2260A17.2	ENST00000504056.1	Uncharacterized protein	5	1	1	0	0	0	hsa-miR-19a-5p				-0.64	-0.64
FYTTD1	ENST00000241502.4	forty-two-three domain containing 1	891	4	2	0	2	1	hsa-miR-19a-5p				-0.59	-0.67
C4orf33	ENST00000281146.5	chromosome 4 open reading frame 33	18	3	1	2	0	0	hsa-miR-19b-1-5p				-0.56	-0.67
TRIM7	ENST00000334421.5	tripartite motif containing 7	16	2	1	0	1	0	hsa-miR-19b-1-5p				-0.54	-0.6
CACNG2	ENST00000300105.6	calcium channel, voltage-dependent, gamma subunit 2	5	2	1	1	0	0	hsa-miR-19b-1-5p				-0.51	-0.67
RPP14	ENST00000445193.3	ribonuclease P/MRP 14kDa subunit	1612	3	2	1	0	0	hsa-miR-19b-1-5p				-0.45	-0.61
ZNF117	ENST00000282869.6	zinc finger protein 117	21	5	2	3	0	2	hsa-miR-19a-5p				-0.43	-0.76
HELLS	ENST00000394036.1	helicase, lymphoid-specific	329	3	2	1	0	1	hsa-miR-19a-5p				-0.43	-0.69
BEND6	ENST00000370750.2	BEN domain containing 6	11	2	1	0	1	1	hsa-miR-19b-2-5p				-0.34	-0.79
PLXDC2	ENST00000377252.4	plexin domain containing 2	506	8	1	1	6	1	hsa-miR-19b-2-5p				-0.34	-0.78
CGGBP1	ENST00000309534.6	CGG triplet repeat binding protein 1	990	5	1	2	2	1	hsa-miR-19b-2-5p				-0.31	-0.71
ZNF704	ENST00000327835.3	zinc finger protein 704	124	5	2	0	3	4	hsa-miR-19b-1-5p				-0.29	-0.6
UBE2D4	ENST00000222402.3	ubiquitin-conjugating enzyme E2D 4 (putative)	20	3	2	0	1	0	hsa-miR-19b-1-5p				-0.19	-0.6
AGO3	ENST00000373191.4	argonaute RISC catalytic component 3	198	7	0	3	4	6	hsa-miR-19b-2-5p				-0.18	-0.93
PLA2G16	ENST00000323646.5	phospholipase A2, group XVI	2547	6	2	1	3	2	hsa-miR-19b-1-5p				-0.16	-1.09
GUCY1A2	ENST00000526355.2	guanylate cyclase 1, soluble, alpha 2	24	3	1	1	1	6	hsa-miR-19a-5p				-0.12	-0.75
CFL2	ENST00000341223.3	cofilin 2 (muscle)	902	5	3	1	1	1	hsa-miR-19b-2-5p				-0.12	-0.87
ZNF138	ENST00000440598.1	zinc finger protein 138	357	2	0	2	0	3	hsa-miR-19b-2-5p				-0.06	-0.64
FGF12	ENST00000445105.2	fibroblast growth factor 12	150	4	0	1	3	1	hsa-miR-19b-1-5p				-0.04	-0.6
GSTA2	ENST00000493422.1	glutathione S-transferase alpha 2	5	1	1	0	0	0	hsa-miR-19b-2-5p				0	-0.66
LRRC40	ENST00000370952.3	leucine rich repeat containing 40	88	5	1	0	4	5	hsa-miR-19a-5p				0	-0.66
