# Supplementary material for: Study of the role of leukocyte telomere length-related lncRNA NBR2 in Alzheimer’s disease
Source: Aging (Albany NY). 2024 Sep 16;16(18):12593–607. doi: 10.18632/aging.206107 (PMC11466486; doi:10.18632/aging.206107)
Supplement: Supplementary Table 7 [file aging-16-206107-s005.xlsx]

## Sheet: Supplementary table7
Supplementary Table 7. The gene names of upregulated expressed proteins in Alzheimer's disease (AD) brain drawn from public data (https://doi.org/10.1038/s41593-021-00999-y).
GFAP
YWHAH
XPO1
WDR77
WDR26
VPS26A
VIM
VCP
VCAN
VAT1L
VAT1
UGP2
UBE2I
UBA1
TXNDC17
TUBAL3
TSPO
TRIM25
TPPP3
TPP1
TPD52L2
TPD52L1
TOP2B
TMPO
TMEM43
TMEM30A
TLN1
TKT
TJP2
TJP1
TCEAL3
TBCB
TBCA
TARS
TARDBP
TALDO1
SYT2
SYNM
SUCLG2
STX6
STX4
STIP1
STAT3
SRSF7
SRSF3
SRSF2
SRSF1
SRI
SQSTM1
SPR
SORD
SOD2
SNX1
SNTB1
SNTA1
SNRPD3
SNRPD2
SNRPB
SNRPA
SMC1A
SLC9A6
SLC9A3R1
SLC25A18
SIRT2
SH3BGRL
SFPQ
SF3B3
SEPT9
SEPT2
SEPT10
SELENBP1
SEC22B
SEC14L2
SCRN1
SCO1
SCARB2
SAFB
SACM1L
S100B
S100A6
S100A11
RUVBL2
RUVBL1
RTCB
RPS6KA2
RPS3
RPS25
RPL6
RNPS1
RNH1
RBBP7
RBBP4
RANGAP1
RALY
RAB6B
RAB2B
RAB27B
QDPR
PYGB
PTRHD1
PTPLAD1
PTGR2
PTGR1
PTGDS
PTBP2
PTBP1
PSME1
PSMD4
PSMD3
PSMD14
PSMD1
PSMC6
PSMB5
PSMB2
PSMB1
PSMA7
PSMA6
PSMA5
PSMA4
PSMA3
PSMA1
PSAT1
PRPF8
PROSC
PRNP
PRKCA
PRKACA
PRKAB2
PREPL
PRDX6
PRDX2
PRDX1
PPT1
PPIB
PPIA
PNPO
PLXNB2
PLXNB1
PLSCR4
PLEC
PLCD3
PLCD1
PLCD1
PKM
PKM
PITPNB
PHYHD1
PHGDH
PGM3
PGM2
PGM1
PGLS
PGK1
PGD
PGAM2
PFN2
PFN1
PEPD
PEA15
PDLIM5
PDIA3
PCMT1
PCDH9
PBXIP1
PARVA
PARK7
PAICS
PAFAH1B3
PADI2
PACSIN2
P2RX7
OPALIN
NUTF2
NUDCD2
NUDC
NUCKS1
NRXN1
NPTX1
NPEPPS
NPC2
NONO
NME2
NEFM
NEFL
NEFH
NDRG4
NCL
NCDN
NCDN
NAMPT
NAGK
NADK2
MYO1C
MYL3
MYL12A
MYH9
MTMR1
MTHFD1
MTAP
MSN
MOB1A
MLC1
MFN1
MECP2
MDH1
MAPRE1
MAPK3
MAPK15
MAPK1
MAP2K6
MAP2K2
MAP2K1
MAOB
MAN2C1
MACROD1
LTA4H
LSM8
LSAMP
LRP1
LMNB2
LMNA
LMBRD2
LLGL1
LIN7C
LHPP
LGI4
LGALS3
LGALS1
LDHB
LCMT1
LANCL1
LAMTOR2
LAMC1
LAMA5
KRT9
KRT1
KPNB1
KPNA3
KCTD12
KCNA1
KATNAL2
ITPKB
ITM2B
ITGB8
ITGB1
IQGAP1
IMPA1
ILF3
IDH1
HSPB8
HSPB6
HSPB1
HSPA5
HSPA2
HSPA1B
HSP90AB1
HSP90AA1
HP1BP3
HNRNPU
HNRNPR
HNRNPM
HNRNPK
HNRNPH3
HNRNPH1
HNRNPC
HNRNPA2B1
HNRNPA1
HMGB1
HLA-A
HIST2H3PS2
HIST2H2AA4
HIST1H4A
HIST1H2BM
HIST1H1E
HEPACAM
HEBP2
HDHD2
HAPLN2
H3F3B
H2AFY
H2AFX
H2AFV
H1F0
GYG1
GUCY1B3
GUCY1A2
GSTZ1
GSTP1
GSTM2
GSN
GRHPR
GRB2
GPX1
GPI
GPD1
GNPDA1
GNG12
GNAQ
GNA13
GNA11
GMPR2
GMPR
GLUD1
GLOD4
GLO1
GJA1
GFAP
GATM
GARS
GAPVD1
GAPDH
GAK
GABARAPL1
GAA
G6PD
FXYD1
FTL
FKBP4
FHL1
FGF1
FDPS
FBXO2
FASN
FAM98B
FAH
FABP7
FABP5
EZR
ETF1
ESYT1
ESD
ERLIN2
EPHX1
EPDR1
ENO2
ENO1
EIF5B
EIF5
EIF4A2
EIF4A1
EIF3E
EIF3D
EIF3A
EIF2S3
EGFR
EEF2
EEF1A1
DTNA
DST
DPYSL3
DNAJB2
DMXL1
DKK3
DIAPH1
DHX9
DHX15
DDX3X
DDX17
DDX1
DDAH2
DDAH1
DCXR
DBI
DARS
DAK
CYFIP1
CUL5
CTSD
CTSB
CSTB
CSRP1
CSNK1D
CRYL1
CROCC
CPNE6
CPNE3
CPE
COTL1
COPS5
COPB2
COPA
CNPY3
CNN3
CNDP2
CMPK1
CMBL
CMAS
CLU
CLIC4
CLIC1
CLCN6
CLCN3
CHGA
CELF2
CDKN1B
CD99
CD44
CCT8
CCK
CBR3
CAT
CARKD
CAPS
CAPNS1
CAPN2
CAPN1
CAPG
CANX
CAMK2G
CALR
CALB2
CA2
C4B
C4A
C3
C2CD2
C1QC
C1orf123
C14orf166
BLVRB
BLVRA
BDH2
BCL2L2
BAG3
B4GAT1
B2M
ATP9A
ATP8A1
ATP2B4
ATIC
ATG9A
ATG3
ASNA1
ARRB1
ARPC5
ARL8B
ARL1
ARHGAP5
ARHGAP1
ARFIP1
APRT
APP
APOE
APOD
ANXA5
ANXA4
ANXA3
ANXA2
ANXA1
ANKFY1
ANK2
AMPD2
ALDH9A1
ALDH3A2
ALDH1L1
ALAD
AKR7A2
AKR1C3
AKR1C1
AKR1B1
AKR1A1
AK1
AIP
AHNAK
AHCY
AGRN
ADIRF
ADH5
ADD3
ADCYAP1R1
ADAM22
ACTR3
ACSL1
ACOT9
ACLY
ACAT2
ACAN
ABHD14B
