# Supplementary material for: Study of the role of leukocyte telomere length-related lncRNA NBR2 in Alzheimer’s disease
Source: Aging (Albany NY). 2024 Sep 16;16(18):12593–607. doi: 10.18632/aging.206107 (PMC11466486; doi:10.18632/aging.206107)
Supplement: Supplementary Table 9 [file aging-16-206107-s007.xlsx]

## Sheet: Supplementary table9
Supplementary Table 9. Gene Ontology (GO) enrichment analysis results.
Category	Term	Count	%	PValue	Genes	List Total	Pop Hits	Pop Total	Fold Enrichment	Bonferroni	Benjamini	FDR
GOTERM_MF_DIRECT	GO:0005385~zinc ion transmembrane transporter activity	11	8.94309	3.67582e-16	SLC30A7, SLC30A6, SLC30A9, SLC30A3, SLC30A2, SLC39A11, SLC30A1, SLC39A12, SLC39A2, SLC39A1, SLC39A3	122	26	18976	65.8058	9.02611e-14	9.96149e-14	8.74846e-14
GOTERM_MF_DIRECT	GO:0030507~spectrin binding	7	5.69106	1.23053e-08	DMTN, EPB41, PTPRN, ANK2, ANK3, ANK1, ADD1	122	26	18976	41.8764	3.33474e-06	1.66737e-06	1.46433e-06
GOTERM_MF_DIRECT	GO:0008324~cation transmembrane transporter activity	5	4.06504	1.4986e-06	SLC30A7, SLC30A6, SLC30A9, SLC30A3, SLC30A1	122	14	18976	55.5504	0.000406038	0.000133964	0.000117651
GOTERM_MF_DIRECT	GO:0046873~metal ion transmembrane transporter activity	5	4.06504	2.03348e-06	SLC39A11, SLC39A12, SLC39A2, SLC39A1, SLC39A3	122	15	18976	51.847	0.000550921	0.000133964	0.000117651
GOTERM_MF_DIRECT	GO:0051015~actin filament binding	11	8.94309	2.47166e-06	TMOD1, AFDN, DMTN, TMOD4, ACTN1, SHROOM3, PICK1, FLNA, ADD3, ADD1, PLEC	122	233	18976	7.34314	0.000669597	0.000133964	0.000117651
GOTERM_CC_DIRECT	GO:0005886~plasma membrane	66	53.6585	9.85438e-11	RET, SPARC, HSP90AB1, RASGRF2, PTPRN, RASGRF1, F11R, CLDN1, GJA1, AKT1, SLC39A2, SLC39A1, HRAS, SLC39A3, NSF, RAB2B, SLC30A3, SLC30A2, ACTN1, SLC39A11, ANK2, SLC30A1, GFRA1, SLC39A12, ANK3, GFRA3, GABRG3, ANK1, GFRA2, RHOA, PLSCR1, OAS3, PLSCR4, CLDN7, PICK1, PLEC, GRAMD1C, NOTCH2, NOTCH3, EPB41, ATP10D, ATP1A2, ADD3, DLL1, GABARAP, ADD1, TRAK2, DLL4, MARVELD2, FLNA, JAG2, GABRQ, GABBR2, GABRA1, …	121	5458	20660	2.06469	2.4833e-08	2.4833e-08	2.08913e-08
GOTERM_CC_DIRECT	GO:0070160~occluding junction	7	5.69106	9.06915e-09	TJP1, AFDN, GJA1, OCLN, MARVELD2, F11R, CLDN1	121	27	20660	44.2669	2.28542e-06	1.14271e-06	9.6133e-07
GOTERM_CC_DIRECT	GO:0005856~cytoskeleton	16	13.0081	8.56188e-07	TMOD1, SLC30A9, TMOD4, EPB41, TMOD3, TMOD2, SHROOM3, ANK2, ADD3, GRIN2B, ANK1, RHOA, ADD1, PICK1, HAP1, PLEC	121	558	20660	4.89588	0.000215736	7.19198e-05	6.0504e-05
GOTERM_CC_DIRECT	GO:0005794~Golgi apparatus	22	17.8862	2.60131e-06	SLC30A7, RAB2A, NSF, RAB2B, GABARAPL2, SLC30A6, GABARAPL1, PTPRN, SLC39A11, ICA1, SLC30A1, GFRA1, ANK3, ZDHHC17, GABARAP, AGBL4, GJA1, PLSCR1, GDNF, PICK1, HRAS, BEND5	121	1147	20660	3.27495	0.000655316	0.000163883	0.000137869
GOTERM_CC_DIRECT	GO:0031410~cytoplasmic vesicle	12	9.7561	3.3047e-06	SLC30A7, GABARAPL2, OCLN, SLC30A9, DMTN, MARVELD2, HAP1, SLC39A2, DLL1, RHOA, GABARAP, TRAK2	121	327	20660	6.26583	0.00083244	0.000166557	0.000140119
GOTERM_BP_DIRECT	GO:0071577~zinc II ion transmembrane transport	9	7.31707	1.32914e-12	SLC30A6, SLC30A9, SLC30A3, SLC30A2, SLC39A11, SLC30A1, SLC39A2, SLC39A1, SLC39A3	118	25	19462	59.3756	1.86348e-09	1.86346e-09	1.80631e-09
GOTERM_BP_DIRECT	GO:0006829~zinc II ion transport	6	4.87805	1.3813e-08	SLC30A7, SLC30A6, SLC30A9, SLC30A3, SLC30A1, SLC39A2	118	14	19462	70.6852	1.93656e-05	9.6829e-06	9.38592e-06
GOTERM_BP_DIRECT	GO:0045216~cell-cell junction organization	6	4.87805	3.47714e-07	TJP1, GJA1, OCLN, MARVELD2, FLNA, CLDN1	118	25	19462	39.5837	0.000487377	0.000162499	0.000157515
GOTERM_BP_DIRECT	GO:0030239~myofibril assembly	5	4.06504	1.18537e-06	TMOD1, TMOD4, TMOD3, TMOD2, MYL9	118	14	19462	58.9044	0.00166051	0.000415473	0.00040273
GOTERM_BP_DIRECT	GO:0010628~positive regulation of gene expression	15	12.1951	2.8729e-06	RET, FBLN1, PAX6, ANK2, ANK3, IGF1, DLL1, INS, DLL4, AFDN, GJA1, PLSCR1, OCLN, AKT1, KRAS	118	519	19462	4.76683	0.0040197	0.00080556	0.000780853
