# Supplementary material for: Study of the role of leukocyte telomere length-related lncRNA NBR2 in Alzheimer’s disease
Source: Aging (Albany NY). 2024 Sep 16;16(18):12593–607. doi: 10.18632/aging.206107 (PMC11466486; doi:10.18632/aging.206107)
Supplement: Supplementary Table 10 [file aging-16-206107-s008.xlsx]

## Sheet: Supplementary table10
Supplementary Table 10. Kyoto Encyclopedia of Genes and Genomes (KEGG) enrichment pathway annotated classification results.
Category	Term	Count	%	PValue	Genes	List Total	Pop Hits	Pop Total	Fold Enrichment	Bonferroni	Benjamini	FDR
KEGG_PATHWAY	hsa04014:Ras signaling pathway	16	13.0081	2.3198e-09	CALML5, CALML6, RASGRF2, RASGRF1, IGF2, CALML3, CALML4, IGF1, GRIN2B, RHOA, INS, AFDN, AKT1, KRAS, CALM3, HRAS	79	236	8586	7.36838	4.96438e-07	4.96438e-07	2.87655e-07
KEGG_PATHWAY	hsa05010:Alzheimer disease	16	13.0081	1.44151e-06	CALML5, CALML6, SLC39A11, CALML3, SLC39A12, CALML4, GRIN2B, INS, AKT1, CYCS, KRAS, CALM3, SLC39A2, HRAS, SLC39A1, SLC39A3	79	384	8586	4.52848	0.000308436	2.8044e-05	1.62498e-05
KEGG_PATHWAY	hsa04670:Leukocyte transendothelial migration	8	6.50407	7.76151e-05	AFDN, OCLN, ACTN1, CLDN7, F11R, CLDN1, MYL9, RHOA	79	115	8586	7.56059	0.0164731	0.000670497	0.000388512
KEGG_PATHWAY	hsa04218:Cellular senescence	8	6.50407	0.000512265	CALML5, CALML6, AKT1, KRAS, CALM3, CALML3, CALML4, HRAS	79	156	8586	5.57352	0.103855	0.00267377	0.00154929
KEGG_PATHWAY	hsa04210:Apoptosis	5	4.06504	0.03492	BCL2, CYCS, AKT1, KRAS, HRAS	79	136	8586	3.99572	0.999503	0.0868939	0.0503498
KEGG_PATHWAY	hsa04660:T cell receptor signaling pathway	5	4.06504	0.0240686	CD4, AKT1, KRAS, HRAS, RHOA	79	121	8586	4.49106	0.994558	0.066892	0.0387598
KEGG_PATHWAY	hsa01522:Endocrine resistance	11	8.94309	1.5603e-08	JAG2, NOTCH2, DLL4, NOTCH3, JAG1, BCL2, AKT1, KRAS, IGF1, HRAS, DLL1	79	98	8586	12.1992	3.33903e-06	1.11301e-06	6.44923e-07
KEGG_PATHWAY	hsa04722:Neurotrophin signaling pathway	10	8.13008	1.13829e-06	CALML5, CALML6, BCL2, AKT1, KRAS, CALM3, CALML3, CALML4, HRAS, RHOA	79	119	8586	9.13307	0.000243565	2.43595e-05	1.41149e-05
KEGG_PATHWAY	hsa04750:Inflammatory mediator regulation of TRP channels	6	4.87805	0.00191149	CALML5, CALML6, CALM3, CALML3, CALML4, IGF1	79	98	8586	6.65409	0.335984	0.00730461	0.00423258
KEGG_PATHWAY	hsa04213:Longevity regulating pathway - multiple species	5	4.06504	0.00222215	AKT1, KRAS, IGF1, HRAS, INS	79	61	8586	8.90849	0.378779	0.00834279	0.00483414
